# Supplementary material for: Differential Treatment Effects of Subgroup Analyses in Phase 3 Oncology Trials From 2004 to 2020
Source: PubMed Central journal article supplement (PMC10979321; doi:10.1001/jamanetworkopen.2024.3379), 2024-03-28
Supplement: jamanetwopen-e243379-s002.pdf [file jamanetwopen-e243379-s002.pdf]

## Data Sharing Statement

Sherry. Differential Treatment Effects of Subgroup Analyses in Phase 3 Oncology Trials from 2004 to 2020. *JAMA Netw Open*. Published March 28, 2024.

doi:10.1001/jamanetworkopen.2024.3379

### Data

**Data available:** Yes

**Data types:** Data (not involving human participants)

**How to access data:** Research data are stored in an institutional repository and will be shared upon reasonable request to the corresponding author up to 1 year following publication of the manuscript.

**When available:** With publication

### Supporting Documents

**Document types:** None

### Additional Information

**Who can access the data:** Data will be available to researchers whose proposed use of the data has been approved.

**Types of analyses:** For specified purpose as discussed with the corresponding author.

**Mechanisms of data availability:** With a signed data access agreement

**Any additional restrictions:** Data will be available up to 1 year after publication
